# Supplementary material for: Graphene-enhanced plasmonic nanohole arrays for environmental sensing in aqueous samples
Source: publisher site journal article supplement (doi:10.3762/bjnano.7.150), 2016-11-01
Supplement: Additional file 1 [file 2190-4286-7-150-S1.pdf]

# Supporting Information

for

## **Graphene-enhanced plasmonic nanohole arrays for environmental sensing in aqueous samples**

Christa Genslein<sup>1</sup>, Peter Hausler<sup>2</sup>, Eva-Maria Kirchner<sup>1</sup>, Rudolf Bierl<sup>2</sup>,  
Antje J. Baeumner<sup>1</sup> and Thomas Hirsch\*<sup>1</sup>

Address: <sup>1</sup>Institute of Analytical Chemistry, Chemo and Biosensors, University of Regensburg, 93040 Regensburg, Germany and <sup>2</sup>Sensorik-ApplikationsZentrum, OTH Regensburg, Franz-Mayer-Str. 1, 93053 Regensburg, Germany

Email: Thomas Hirsch\* - [thomas.hirsch@ur.de](mailto:thomas.hirsch@ur.de)

\* Corresponding author

### **Additional experimental data**

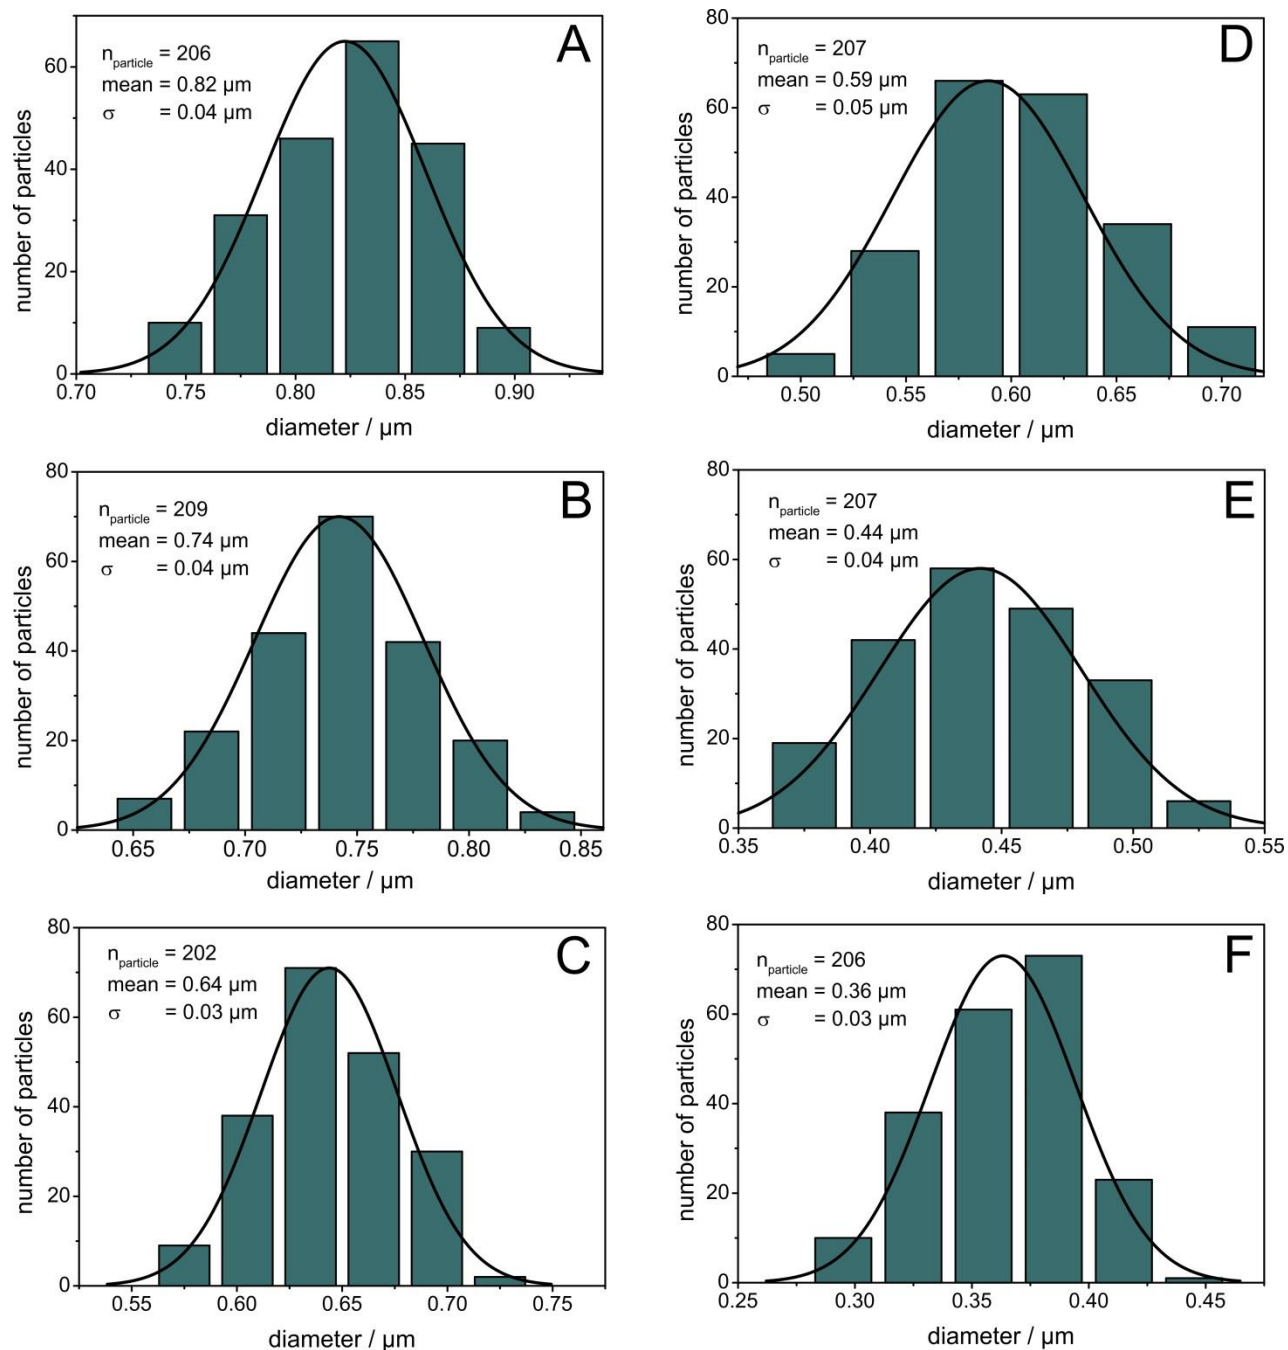

**Figure S1:** The respective size distribution analysis of the particles is from the SEM images (compare Figure 3). A Gaussian function was used for fitting. Substrates were covered by  $\sim 45$  nm Au with a  $\sim 3$  nm Ti adhesion layer. A decrease in the diameter of the polystyrene particles with an increase of the etching time from 8 min (A) to 28 min (F) can be seen.

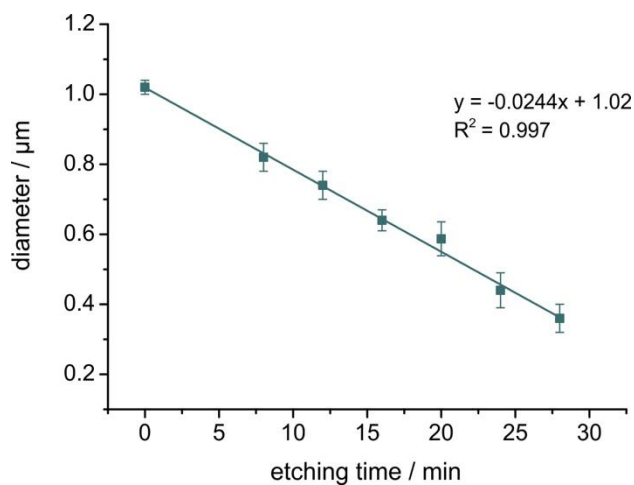

**Figure S2:** Time dependence of the particle diameter reduction. Particles have a starting diameter of 1.02  $\mu\text{m}$ . Etching is performed using reactive ion etching with oxygen plasma. Standard deviation is taken from the respective size distribution of the SEM image analysis (Figure S1).

**Table S3:** Fitting parameter for the interaction of DEP with rGO on various substrates. The Langmuir model was used.

| substrate                        | $K / \mu\text{M}$  | $K_A / \mu\text{M}^{-1}$ | $R^2$  |
|----------------------------------|--------------------|--------------------------|--------|
| continuous film                  | 0.17<br>$\pm 0.03$ | $6 \pm 1$                | 0.9693 |
| nanohole<br>array<br>with<br>D/P | 0.35               | $5 \pm 1$                | 0.9149 |
|                                  | 0.43<br>$\pm 0.02$ | $7 \pm 0.9$              | 0.9847 |
|                                  | 0.58<br>$\pm 0.04$ | $5 \pm 1$                | 0.9585 |

$$\Delta s = \frac{c}{K + c},$$

where  $\Delta s$  is the signal change,  $c$  is the DEP concentration and  $K$  represents the equilibrium dissociation constant.
